# Supplementary material for: Bycatch Dynamics from a Small-Scale Shrimp Trap Fishery in the Mediterranean Sea
Source: MDPI journal article supplement (doi:10.3390/d14040292), 2022-04-12
Supplement: s1 [file s1]

**Supplementary Table S1.** Market price (€/kg) of commercially important bycatch species in the south-eastern Aegean Sea in 2016.

| <b>Taxonomy</b>               | <b>Common name</b>         | <b>Commercial price (€/kg)</b> |
|-------------------------------|----------------------------|--------------------------------|
| <b>Arthropoda</b>             |                            |                                |
| Malacostraca                  |                            |                                |
| <i>Plesionika edwardsii</i>   | Soldier striped shrimp     | 10                             |
| <b>Chordata</b>               |                            |                                |
| <u>Actinopteri</u>            |                            |                                |
| <i>Spicara smaris</i>         | Blotched picarel           | 5                              |
| <i>Conger conger</i>          | European conger            | 4                              |
| <i>Xyrichtys novacula</i>     | Cleaver wrasse             | 30                             |
| <i>Phycis phycis</i>          | Forkbeard                  | 10                             |
| <i>Sparisoma cretense</i>     | Parrotfish                 | 12                             |
| <i>Scorpaena notata</i>       | Small red scorpionfish     | 15                             |
| <i>Scorpaena porcus</i>       | Black scorpionfish         | 15                             |
| <i>Scorpaena scrofa</i>       | Largescaled scorpionfish   | 15                             |
| <i>Epinephelus aeneus</i>     | White grouper              | 25                             |
| <i>Epinephelus marginatus</i> | Dusky grouper              | 25                             |
| <i>Serranus cabrilla</i>      | Comber                     | 6                              |
| <i>Serranus hepatus</i>       | Brown comber               | 6                              |
| <i>Serranus scriba</i>        | Painted comber             | 6                              |
| <i>Siganus luridus</i>        | Dusky spinefoot            | 5                              |
| <i>Siganus rivulatus</i>      | Marbled spinefoot          | 5                              |
| <i>Diplodus annularis</i>     | Annular seabream           | 10                             |
| <i>Diplodus puntazzo</i>      | Sharpsnout seabream        | 25                             |
| <i>Diplodus sargus sargus</i> | White seabream             | 25                             |
| <i>Diplodus vulgaris</i>      | Common two-banded seabream | 20                             |
| <i>Pagellus acarne</i>        | Axillary seabream          | 10                             |
| <i>Pagrus pagrus</i>          | Common seabream            | 25                             |
| <i>Sparus aurata</i>          | Gilthead seabream          | 15                             |
| <i>Spondylusoma cantharus</i> | Black seabream             | 25                             |
| <b>Mollusca</b>               |                            |                                |
| <u>Cephalopoda</u>            |                            |                                |
| <i>Eledone cirrhosa</i>       | Curled octopus             | 7                              |
| <i>Octopus vulgaris</i>       | Common octopus             | 10                             |
| <i>Sepia officinalis</i>      | Common cuttlefish          | 12                             |
